# Supplementary material for: Widespread imprinting of transposable elements and variable genes in the maize endosperm
Source: PubMed Central journal article supplement (PMC8057601; doi:10.1371/journal.pgen.1009491), 2021-04-08
Supplement: pgen.1009491.s008.pdf [file pgen.1009491.s008.pdf]

### Table S1

| Library | Reads    | Percent_Unique |
|---------|----------|----------------|
| BW1     | 50912503 | 16.09983       |
| BW2     | 46955481 | 16.63385       |
| BW3     | 43297034 | 17.88011       |
| WB1     | 42341423 | 18.12524       |
| WB2     | 38350809 | 14.4479        |
| WB3     | 53936174 | 13.86724       |
| BP1     | 50287029 | 14.24699       |
| BP2     | 51260636 | 16.18052       |
| BP3     | 45525383 | 16.54365       |
| PB1     | 43670832 | 19.41905       |
| PB2     | 39706669 | 18.70737       |
| PB3     | 41024925 | 15.71401       |
| WP1     | 53203456 | 15.92903       |
| WP2     | 52838664 | 16.56664       |
| WP3     | 41023269 | 19.63248       |
| PW1     | 53900552 | 15.71085       |
| PW2     | 35267586 | 18.17527       |
| PW3     | 35654524 | 18.32236       |

Table S1: Reads and mapping statistics for RNA-seq libraries in this study
