# Supplementary material for: Widespread imprinting of transposable elements and variable genes in the maize endosperm
Source: PubMed Central journal article supplement (PMC8057601; doi:10.1371/journal.pgen.1009491), 2021-04-08
Supplement: pgen.1009491.s009.pdf [file pgen.1009491.s009.pdf]

Table S2

| Gene ID                   | Feature        | Genome | Imprinted |
|---------------------------|----------------|--------|-----------|
| GRMZM2G365731 (ARID1)     | Zm00001d032832 | B73    | PEG       |
| AC191534.3_FG003 (VIM104) | Zm00001d019342 | B73    | PEG       |
| GRMZM2G073700             | Zm00001d037209 | B73    | MEG       |
| GRMZM5G866423 (ARID9)     | Zm00001d032096 | B73    | PEG       |
| GRMZM2G118205 (FIE1)      | Zm00001d049608 | B73    | MEG       |
| GRMZM2G379898             | Zm00001d027290 | B73    | MEG       |
| GRMZM2G365731 (ARID1)     | Zm00004b004198 | W22    | PEG       |
| AC191534.3_FG003 (VIM104) | Zm00004b035225 | W22    | PEG       |
| GRMZM2G073700             | Zm00004b029838 | W22    | MEG       |
| GRMZM5G866423 (ARID9)     | Zm00004b003587 | W22    | PEG       |
| GRMZM2G118205 (FIE1)      | Zm00004b020902 | W22    | MEG       |
| GRMZM2G379898             | Zm00004b000042 | W22    | MEG       |
| GRMZM2G365731 (ARID1)     | Zm00008a004277 | PH207  | PEG       |
| AC191534.3_FG003 (VIM104) | Zm00008a027204 | PH207  | PEG       |
| GRMZM2G073700             | Zm00008a025023 | PH207  | MEG       |
| GRMZM5G866423 (ARID9)     | Zm00008a003685 | PH207  | PEG       |
| GRMZM2G118205 (FIE1)      | Zm00008a015599 | PH207  | MEG       |
| GRMZM2G379898             | Zm00008a000045 | PH207  | MEG       |

Table S2 - Gene IDs for conserved imprinted genes plotted in Figure 1C
