# Supplementary material for: Widespread imprinting of transposable elements and variable genes in the maize endosperm
Source: PubMed Central journal article supplement (PMC8057601; doi:10.1371/journal.pgen.1009491), 2021-04-08
Supplement: pgen.1009491.s010.pdf [file pgen.1009491.s010.pdf]

Table S3

| TE                    | gene           | distance | TE.type | gene.type | order | ratio.BW.gene | ratio.BP.gene | ratio.BW.TE | ratio.BP.TE | gene.variability | gene.expression | TE.expression  |
|-----------------------|----------------|----------|---------|-----------|-------|---------------|---------------|-------------|-------------|------------------|-----------------|----------------|
| DHH00002Zm00001d06247 | Zm00001d029042 | 0        | matTE   | MEG       | DHH   | NA            |               | 1           | NA          | 1 variable       | endo.preferred  | endo.preferred |
| RLG00003Zm00001d01354 | Zm00001d031633 | -925     | matTE   | MEG       | RLG   | 1             | NA            | 1           | 0.841323333 | variable         | endo.preferred  | endo.preferred |
| RLX19061Zm00001d00001 | Zm00001d023985 | 0        | matTE   | MEG       | RLX   | 1             |               | 1           | 0.97095182  | 1 variable       | endo.preferred  | endo.preferred |
| RLC00002Zm00001d00679 | Zm00001d026623 | -797     | matTE   | MEG       | RLC   | 0.996352427   | 0.735195542   | 1           | 0.701963246 | conserved.maize  | endo.preferred  | endo.preferred |
| DHH00002Zm00001d01432 | Zm00001d004147 | 0        | matTE   | MEG       | DHH   | 0.992924908   |               | 1           | 1           | 1 variable       | endo.preferred  | endo.preferred |
| RLC02716Zm00001d00002 | Zm00001d005712 | -29185   | matTE   | MEG       | RLC   | 1             |               | 1           | 1           | 1 variable       | endo.preferred  | endo.preferred |
| RLG00003Zm00001d02516 | Zm00001d005712 | -3087    | matTE   | MEG       | RLG   | 1             |               | 1           | 1           | 1 variable       | endo.preferred  | endo.preferred |
| RLC00004Zm00001d02983 | Zm00001d007488 | -852     | matTE   | MEG       | RLC   | 0.954011986   | 0.971259533   | 0.912021829 | 0.991412204 | variable         | constitutive    | constitutive   |
| RLX11772Zm00001d00001 | Zm00001d041755 | -1453    | matTE   | MEG       | RLX   | 1             | NA            | 1           | NA          | variable         | endo.preferred  | endo.preferred |
| DHH00002Zm00001d07691 | Zm00001d041887 | 0        | matTE   | MEG       | DHH   | 0.982580808   | 0.846116079   | 0.986576458 | 0.961109425 | variable         | endo.preferred  | endo.preferred |
| RLX11447Zm00001d00001 | Zm00001d043716 | 1670     | matTE   | MEG       | RLX   | 0.986874555   | NA            | 0.945756767 | NA          | conserved.maize  | endo.preferred  | endo.preferred |
| RLX11446Zm00001d00001 | Zm00001d043716 | 0        | matTE   | MEG       | RLX   | 0.986874555   | NA            | 0.987866795 | 0.739333538 | conserved.maize  | endo.preferred  | endo.preferred |
| DHH00002Zm00001d02512 | Zm00001d048646 | 0        | matTE   | MEG       | DHH   | 1             | NA            | 1           | 0.415964714 | variable         | endo.preferred  | endo.preferred |
| DHH00002Zm00001d02687 | Zm00001d050068 | 0        | matTE   | MEG       | DHH   | 1             |               | 1           | 1           | 1 variable       | endo.preferred  | endo.preferred |
| DHH00002Zm00001d08890 | Zm00001d017481 | 1078     | matTE   | MEG       | DHH   | 0.932781433   |               | 1           | 0.99597214  | variable         | endo.preferred  | endo.preferred |
| RLG00017Zm00001dS0065 | Zm00001d038034 | -2662    | matTE   | MEG       | RLG   | 0.914617966   | 0.776546976   | 0.956875803 | 0.817167014 | variable         | constitutive    | constitutive   |
| RLG00001Zm00001d12334 | Zm00001d046395 | -47897   | matTE   | MEG       | RLG   | NA            |               | 1           | 1           | 1 variable       | endo.preferred  | endo.preferred |
| RLG00003Zm00001d07748 | Zm00001d046395 | -3398    | matTE   | MEG       | RLG   | NA            |               | 1           | NA          | 1 variable       | endo.preferred  | endo.preferred |
| RLC00183Zm00001dS0162 | Zm00001d046395 | -10170   | matTE   | MEG       | RLC   | NA            |               | 1           | NA          | 1 variable       | endo.preferred  | endo.preferred |

Table S3: IDs and features of matTEs near MEGs
